# Supplementary material for: Composition and Diversity Of Endophytic Bacterial Community in Seeds of Upland Rice Resources from Different Origin Habitats in China
Source: Research Square preprint supplement (doi:10.21203/rs.3.rs-1001992/v1), 2021-11-02
Supplement: Supplementary file 1 [file ca7b217447835b8b0ff88212.docx]

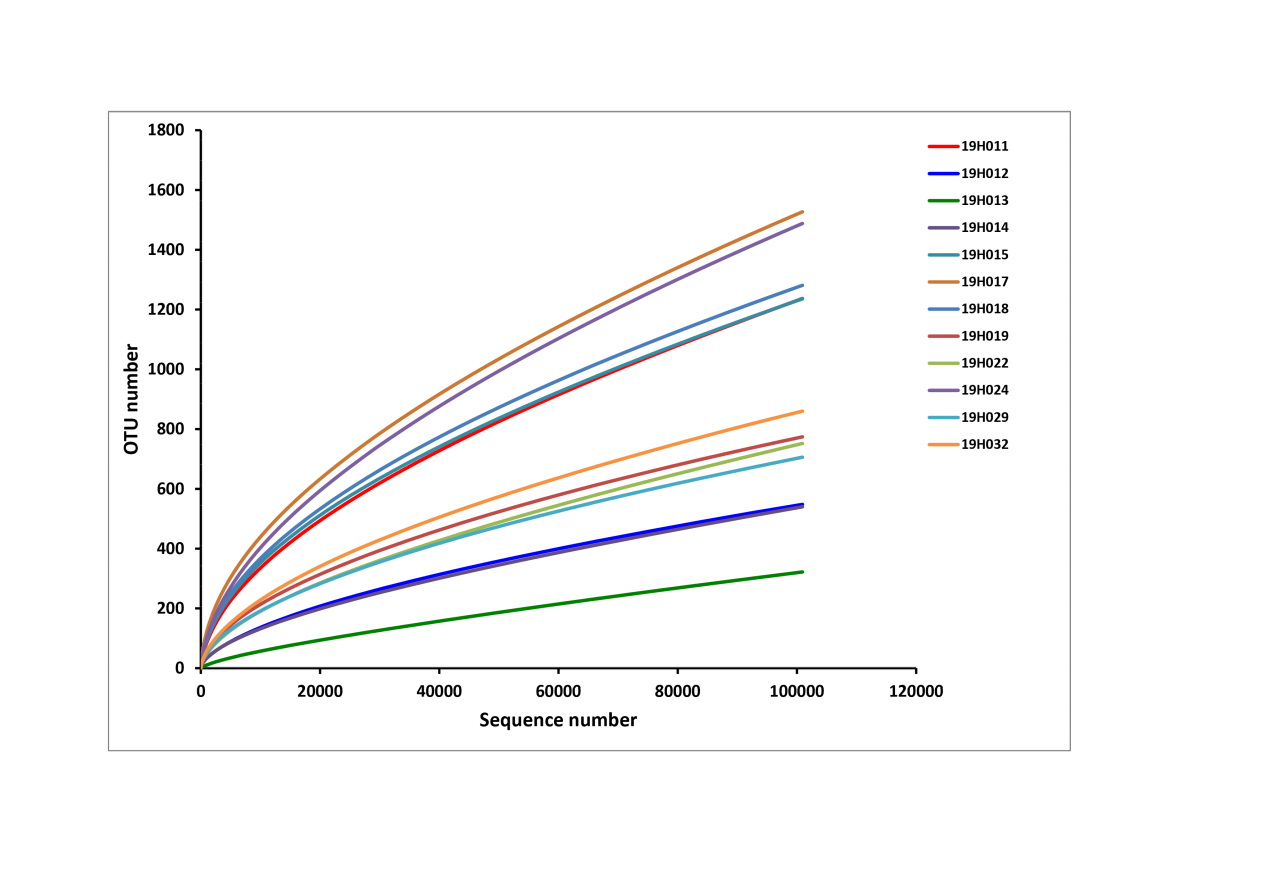


**Supplementary Fig. S1** Rarefaction curve of twelve upland rice seed samples (OTU = 0.03). Rarefaction curves present the relationship between the number of samples and bacterial species richness in OTUs.

**
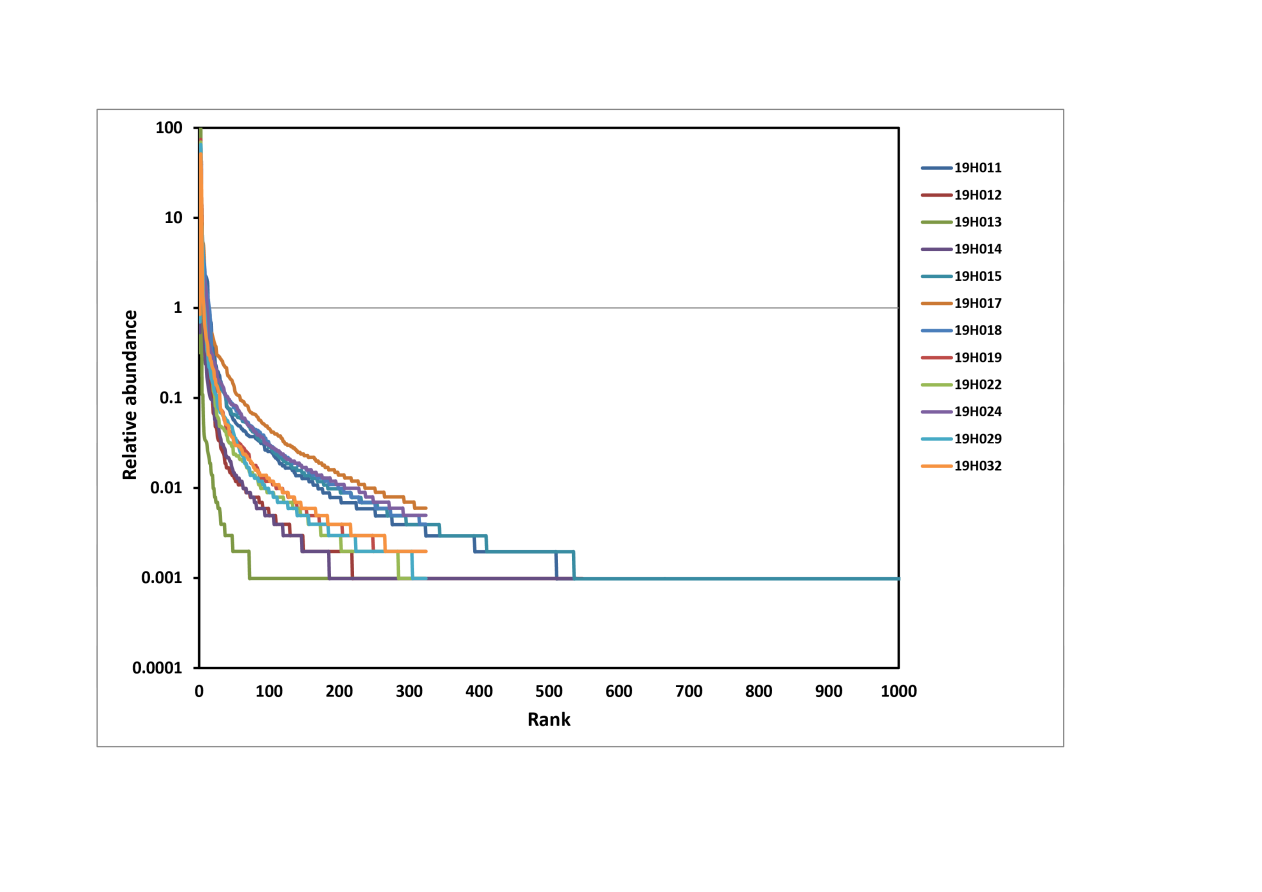
**

**Supplementary Fig. S2** Rank abundance curve of twelveupland rice seed samples (OTU = 0.03). The rank abundance curve is used to observe the richness and evenness of species.

**Supplementary Table S1** Statistics of the upland rice seed samples

| **Sample** | **Read number** | **Minlength** | **Maxlength** | **Average Length** |
| --- | --- | --- | --- | --- |
| **19H011_1** | 35895 | 341 | 541 | 434 |
| **19H011_2** | 39306 | 384 | 505 | 434 |
| **19H011_3** | 44421 | 375 | 503 | 434 |
| **19H012_1** | 43402 | 403 | 503 | 434 |
| **19H012_2** | 42974 | 370 | 522 | 434 |
| **19H012_3** | 44082 | 411 | 528 | 434 |
| **19H013_1** | 52729 | 411 | 502 | 434 |
| **19H013_2** | 57624 | 422 | 503 | 434 |
| **19H013_3** | 56246 | 424 | 503 | 434 |
| **19H014_1** | 51076 | 386 | 503 | 434 |
| **19H014_2** | 57090 | 386 | 503 | 434 |
| **19H014_3** | 56272 | 367 | 503 | 434 |
| **19H015_1** | 53287 | 310 | 542 | 434 |
| **19H015_2** | 59182 | 370 | 503 | 434 |
| **19H015_3** | 59601 | 383 | 546 | 434 |
| **19H017_1** | 60583 | 367 | 503 | 434 |
| **19H017_2** | 61327 | 305 | 505 | 434 |
| **19H017_3** | 60219 | 341 | 520 | 434 |
| **19H018_1** | 61706 | 402 | 503 | 434 |
| **19H018_2** | 62303 | 387 | 502 | 434 |
| **19H018_3** | 45562 | 341 | 503 | 434 |
| **19H019_1** | 63962 | 397 | 503 | 434 |
| **19H019_2** | 61915 | 356 | 541 | 434 |
| **19H019_3** | 58244 | 359 | 503 | 434 |
| **19H022_1** | 59542 | 330 | 503 | 434 |
| **19H022_2** | 66125 | 379 | 503 | 434 |
| **19H022_3** | 68867 | 396 | 504 | 434 |
| **19H024_1** | 67326 | 395 | 504 | 434 |
| **19H024_2** | 67618 | 384 | 534 | 434 |
| **19H024_3** | 68542 | 390 | 505 | 434 |
| **19H029_1** | 68776 | 422 | 549 | 434 |
| **19H029_2** | 62790 | 412 | 503 | 434 |
| **19H029_3** | 55811 | 389 | 502 | 434 |
| **19H032_1** | 72736 | 411 | 504 | 434 |
| **19H032_2** | 72521 | 411 | 503 | 434 |
| **19H032_3** | 70047 | 395 | 540 | 434 |

**Supplementary Table S2** Statistical results of the alpha-diversity of endophytic bacteria in each sample before the sample is repeated without addition

| **Sample** | **OTUs** | **ACE** | **Chao** | **Shannon** | **Simpson** |
| --- | --- | --- | --- | --- | --- |
| 19H011_1 | 638 | 2244.849 | 1610.154 | 2.451886 | 0.264118 |
| 19H011_2 | 646 | 1834.232 | 1371.846 | 2.622823 | 0.214491 |
| 19H011_3 | 648 | 2378.157 | 1370.161 | 2.404326 | 0.272852 |
| 19H012_1 | 260 | 921.1201 | 595.8333 | 1.200866 | 0.496871 |
| 19H012_2 | 315 | 1158.301 | 796.0286 | 1.457118 | 0.398514 |
| 19H012_3 | 256 | 901.3217 | 653.8333 | 1.361228 | 0.429259 |
| 19H013_1 | 155 | 1579.414 | 584.4 | 0.393423 | 0.842405 |
| 19H013_2 | 139 | 1201.96 | 635.3636 | 0.349258 | 0.849197 |
| 19H013_3 | 112 | 1700.36 | 476.0909 | 0.297555 | 0.868767 |
| 19H014_1 | 272 | 1198.418 | 1060.667 | 1.298489 | 0.398397 |
| 19H014_2 | 260 | 1274.988 | 813.0435 | 1.28728 | 0.400868 |
| 19H014_3 | 272 | 911.7981 | 598.7568 | 1.288443 | 0.401985 |
| 19H015_1 | 755 | 2282.966 | 1600.815 | 2.547999 | 0.240513 |
| 19H015_2 | 396 | 2037.948 | 1262.563 | 1.280187 | 0.570363 |
| 19H015_3 | 718 | 2213.745 | 1580.966 | 2.514651 | 0.225515 |
| 19H017_1 | 723 | 2225.284 | 1619.78 | 2.716699 | 0.186833 |
| 19H017_2 | 998 | 3254.527 | 2368.196 | 3.088863 | 0.180601 |
| 19H017_3 | 685 | 2030.187 | 1485.413 | 2.760536 | 0.179811 |
| 19H018_1 | 667 | 2113.219 | 1373 | 2.604757 | 0.191493 |
| 19H018_2 | 674 | 2079.689 | 1548.079 | 2.605142 | 0.194408 |
| 19H018_3 | 735 | 2370.94 | 1722.841 | 2.75305 | 0.157466 |
| 19H019_1 | 425 | 1304.205 | 799 | 1.599329 | 0.45486 |
| 19H019_2 | 411 | 1397.239 | 1009.523 | 1.464879 | 0.488971 |
| 19H019_3 | 389 | 1123.081 | 683.0448 | 1.429507 | 0.514438 |
| 19H022_1 | 388 | 1278.852 | 879.6327 | 1.540694 | 0.447724 |
| 19H022_2 | 389 | 1223.895 | 952.1667 | 1.666564 | 0.379105 |
| 19H022_3 | 365 | 1612.899 | 853.25 | 1.414622 | 0.48997 |
| 19H024_1 | 735 | 2505.95 | 1608.979 | 2.081407 | 0.389308 |
| 19H024_2 | 805 | 2454.842 | 1771.697 | 2.478629 | 0.280399 |
| 19H024_3 | 803 | 2948.619 | 1896.093 | 2.239791 | 0.35721 |
| 19H029_1 | 373 | 1289.267 | 820.8571 | 1.641382 | 0.376878 |
| 19H029_2 | 364 | 1280.773 | 939.1667 | 1.651003 | 0.373221 |
| 19H029_3 | 378 | 1334.556 | 886.3182 | 1.645488 | 0.382678 |
| 19H032_1 | 424 | 1415.856 | 1077.4 | 1.571993 | 0.374198 |
| 19H032_2 | 452 | 1380.318 | 946.1 | 1.755205 | 0.33483 |
| 19H032_3 | 477 | 1837.946 | 1280.72 | 1.69051 | 0.351358 |

**Supplementary Table S3** Statistical results of some endophytic OTUs in upland rice seed samples

| Name | Total | Elements |
| --- | --- | --- |
| 19H011 19H012 19H013 19H014 19H015 19H017 19H018 19H019 19H022 19H024 19H029 19H032 | 39 | Otu05587 Otu00531 Otu03043 Otu00020  Otu00102 Otu01185 Otu01476 Otu01992  Otu01029 Otu04494 Otu00021 Otu00222  Otu01322 Otu02651 Otu05023 Otu00344  Otu01522 Otu01118 Otu04285 Otu00437  Otu02121 Otu00136 Otu04103 Otu01053  Otu00063 Otu01172 Otu00082 Otu02451  Otu03680 Otu00137 Otu01420 Otu00036  Otu00309 Otu00861 Otu03742 Otu00345  Otu01896 Otu02920 Otu02951 |

Note：Only the coexisting OTU statistical results of 12 upland rice seed samples were listed in the table. For detailed results, please contact the author.
